# Supplementary material for: Thymidine catabolism promotes NADPH oxidase-derived reactive oxygen species (ROS) signalling in KB and yumoto cells
Source: PubMed Central journal article supplement (PMC5928239; doi:10.1038/s41598-018-25189-y), 2018-04-30
Supplement: 41598_2018_25189_MOESM1_ESM.pdf [file 41598_2018_25189_MOESM1_ESM.pdf]

Supplemental Information

**Thymidine catabolism promotes NADPH oxidase-derived reactive oxygen species (ROS) signalling in KB and yumoto cells**

Sho Tabata<sup>1</sup>, Masatatsu Yamamoto<sup>2</sup>, Hisatsugu Goto<sup>3</sup>, Akiyoshi Hirayama<sup>1</sup>, Maki Ohishi<sup>1</sup>, Takuya Kuramoto<sup>3</sup>, Atsushi Mitsuhashi<sup>3</sup>, Ryuji Ikeda<sup>4</sup>, Misako Haraguchi<sup>5</sup>, Kohichi Kawahara<sup>2</sup>, Yoshinari Shinsato<sup>2</sup>, Kentaro Minami<sup>2</sup>, Atsuro Saijo<sup>3</sup>, Yuko Toyoda<sup>3</sup>, Masaki Hanibuchi<sup>3</sup>, Yasuhiko Nishioka<sup>3</sup>, Saburo Sone<sup>3</sup>, Hiroyasu Esumi<sup>6</sup>, Masaru Tomita<sup>1</sup>, Tomoyoshi Soga<sup>1</sup>, Tatsuhiko Furukawa<sup>2</sup>, Shin-ichi Akiyama<sup>7</sup>

<sup>1</sup>Institute for Advanced Biosciences, Keio University, 246-2 Mizukami, Kakuganji, Tsuruoka, Yamagata 997-0052, Japan.

<sup>2</sup>Department of Molecular Oncology, Graduate School Medical and Dental Sciences, Kagoshima University, 8-35-1 Sakuragaoka, Kagoshima 890-8544, Japan.

<sup>3</sup>Department of Respiratory Medicine and Rheumatology, Institute of Biomedical Sciences, Tokushima University Graduate School, 3-18-15 Kuramoto-cho, Tokushima 770-8503, Japan.

<sup>4</sup>Department of Pharmacy, University of Miyazaki Hospital, 5200 Kihara, Kiyotake-cho, Miyazaki, 889-1692, Japan.

<sup>5</sup>Department of Biochemistry and Molecular Biology, Graduate School Medical and Dental Sciences, Kagoshima University, 8-35-1 Sakuragaoka, Kagoshima 890-8544, Japan.

<sup>6</sup>Clinical Research, Research Institute for Biomedical Sciences, Tokyo University of Science, 2641 Yamazaki, Noda, Chiba 278-0022, Japan.

<sup>7</sup>Clinical Research Center, National Kyushu Cancer Center, 3-1-1 Notame Minami-ku, Fukuoka 811-1395, Japan.

SUPPLEMENTAL FIGURES AND TABLE

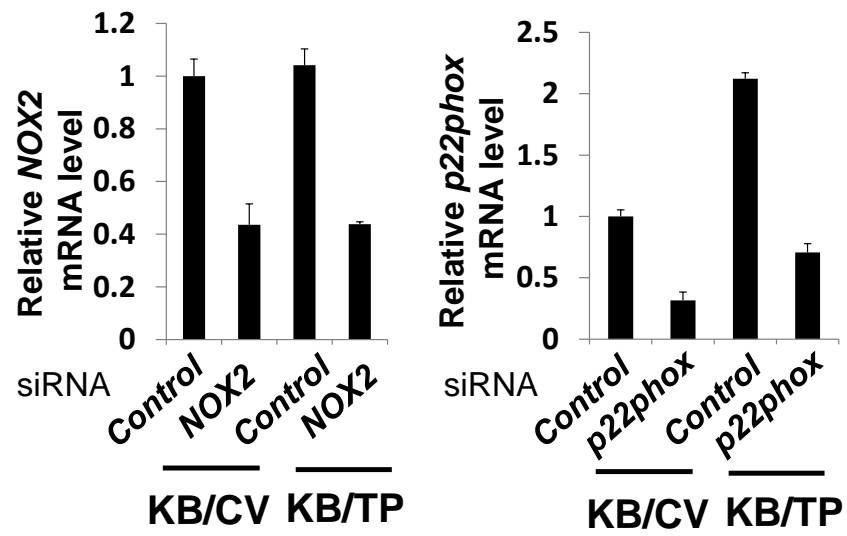

**Figure S1.** Knock down of *NOX2* and *p22phox* in KB/CV and KB/TP cells. KB/CV and KB/TP cells were transfected with *NOX2* siRNA or *p22phox* siRNA. mRNA levels of *NOX2* and *p22phox* were determined by real time PCR.

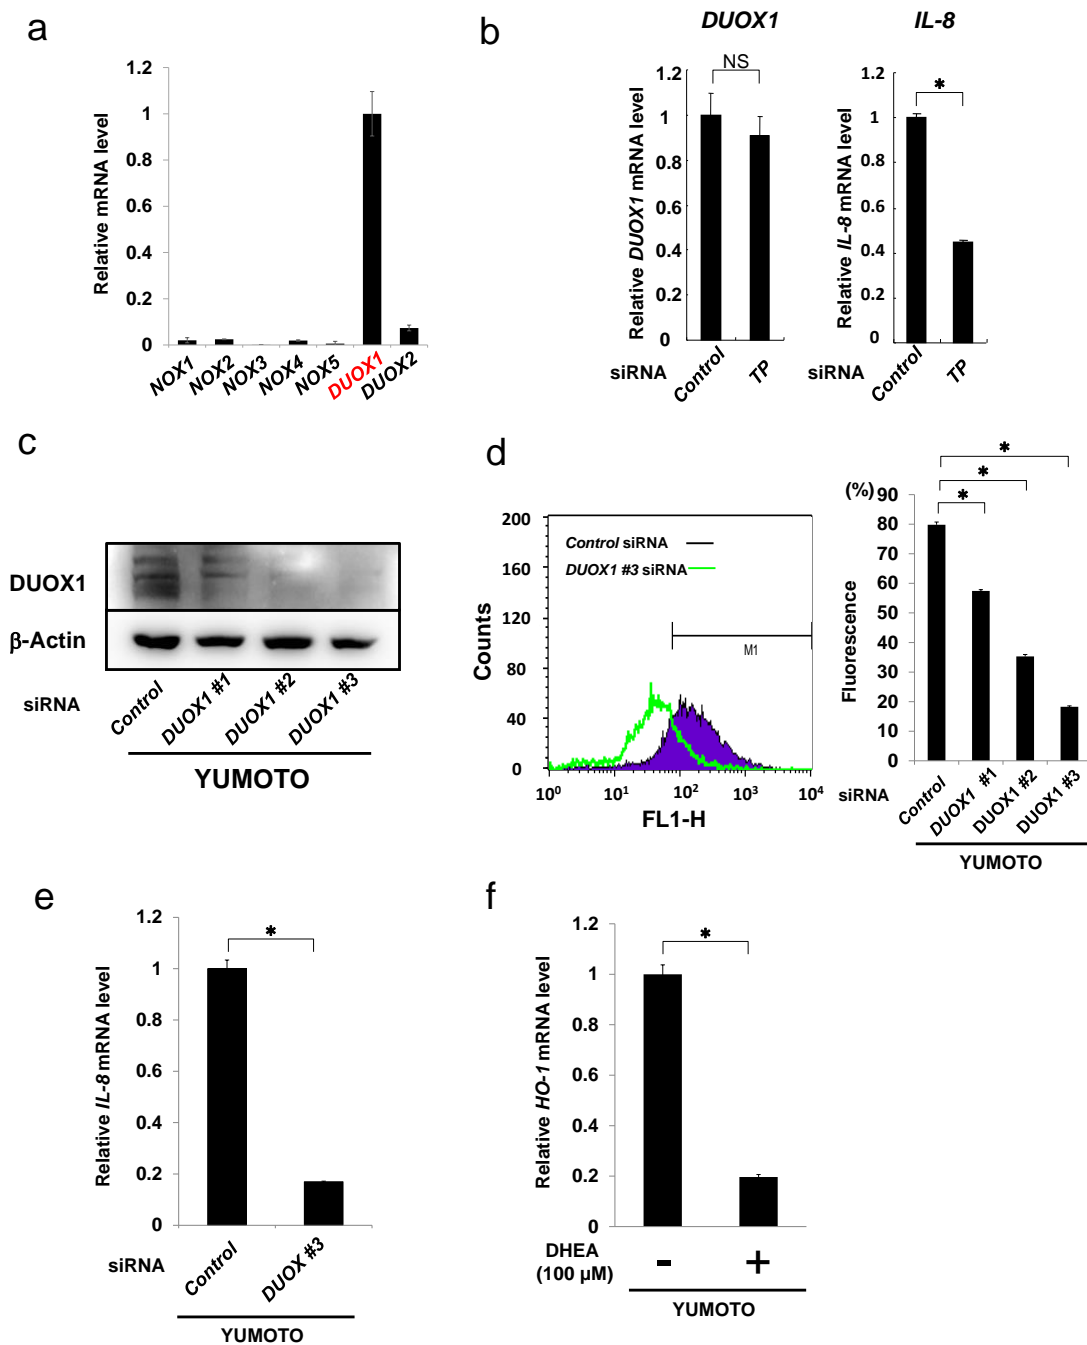

**Figure S2.** Knockdown of DUOX1 in Yumoto cells. (a) Expression of *NOX* isoforms in Yumoto. Expression levels of *NOX* isoforms in Yumoto cells were determined by real-time PCR. (b) Effect of TP silencing on *DUOX1* and *IL-8* expression in Yumoto cells. (c) Knockdown of *DUOX1* in Yumoto cells. (d) Effect of *DUOX1* downregulation on the generation of ROS in Yumoto cells. Yumoto cells transfected with *DUOX1* siRNA were treated with 10 μM H<sub>2</sub>DCF-DA for 1h and the ROS levels were determined by using FACSscan. (d) Effect of *DUOX1* knockdown on *IL-8* expression in Yumoto cells. (f) Effect of DHEA on *HO-1* expression in Yumoto cells. Data are presented as mean ± SD. \**P* < 0.01.

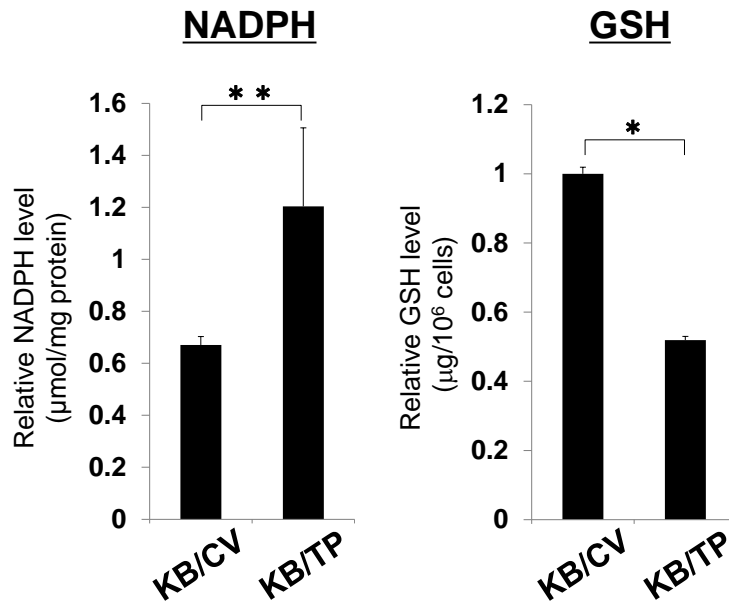

**Figure S3.** NADPH and GSH levels in KB/CV and KB/TP cells. Effect of TP on levels of NADPH (left) and GSH (right) in KB cells. NADPH levels in KB/CV and KB/TP cells were measured using a NADPH assay kit. GSH levels in KB/CV and KB/TP cells were determined using a GSH assay kit. Data are presented as mean  $\pm$  SD. \* $P < 0.01$ , \*\* $P < 0.05$ .

**Table S1. Primer sequences for real-time PCR assays.**

| <b>Gene</b>    | <b>Forward Primer (5'→3')</b> | <b>Reverse Primer (5'→3')</b> |
|----------------|-------------------------------|-------------------------------|
| <i>TP</i>      | GCTGGAGTCTATTCCTGGATTC        | ACTGAGAATGGAGGCTGTGATG        |
| <i>IL-8</i>    | CCTGATTTCTGCAGCTCTGTGT        | GGTGGAAAGGTTTGGAGTATGTCT      |
| <i>HO-1</i>    | CGGGCCAGCAACAAAGTGCAAG        | GTGTAAGGACCCATCGGAGAAG        |
| <i>NOX1</i>    | ACAAATTCCAGTGTGCAGACCA        | AGACTGGAATATCGGTGACAGCA       |
| <i>NOX2</i>    | CTGCGATTCACACCATTGCAC         | CGTGATGACAACCTCCAGTGATG       |
| <i>NOX3</i>    | ATGCAACCATCCACATCGTG          | CGCCTGCTATTGTCCTTAGC          |
| <i>NOX4</i>    | CAGAAGGTTCCAAGCAGGAG          | AAGTTGAGGGCATTACCAG           |
| <i>NOX5</i>    | CAGCTCTGCATGTGAAAGAG          | CATCGATGTCATACACCTGG          |
| <i>DUOX1</i>   | CGACATTGAGACTGAGTTGA          | CTGGAATGACGTTACCTTCT          |
| <i>DUOX2</i>   | AACCTAAGCAGCTCACAACCT         | CAGAGAGCAATGATGGTGAT          |
| <i>p22phox</i> | TCCTGCATCTCCTGCTCTC           | CACAGCCGCCAGTAGGTAG           |
| <i>GAPDH</i>   | GTCAACGGATTTGGTCGTAT          | TGGTGATGGGATTTCCATTG          |

• Figure 1E

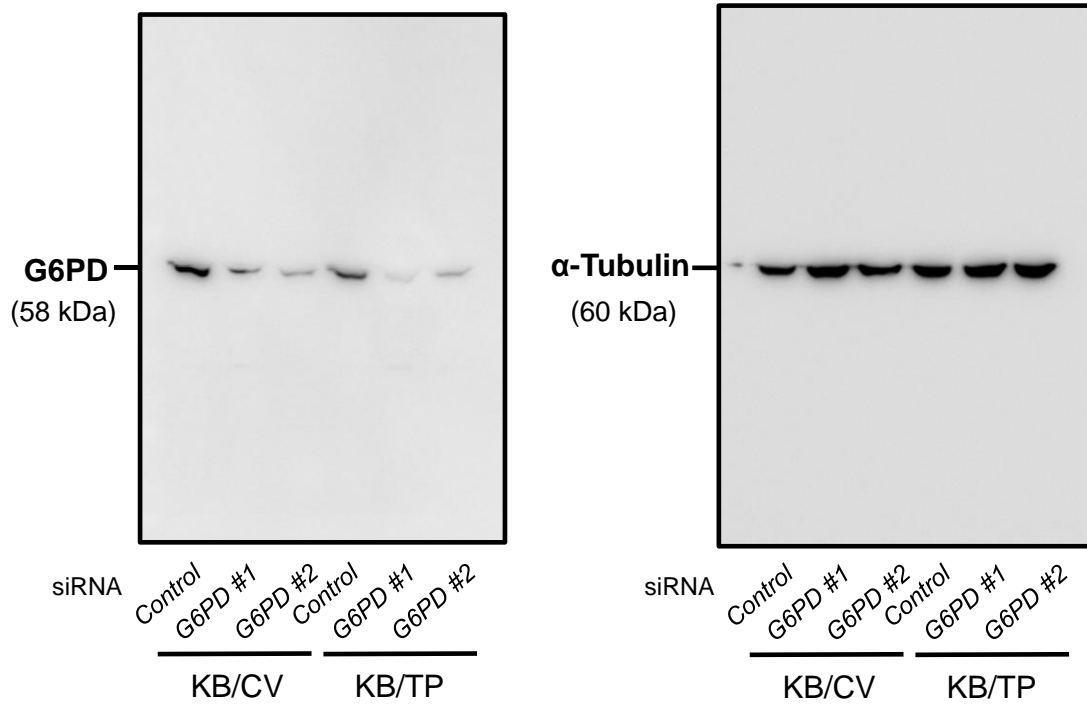

• Figure S2

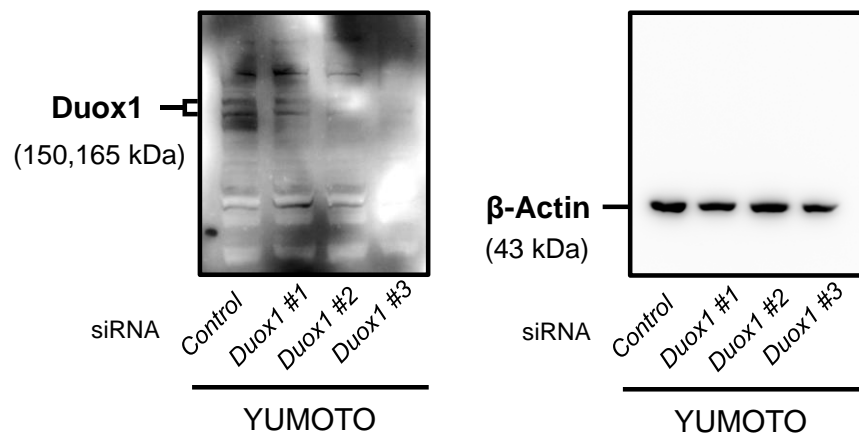

**Figure S4.** Uncropped images used in Figures 1E and S2.
